# Supplementary material for: Identification of Essential Genes in the Salmonella Phage SPN3US Reveals Novel Insights into Giant Phage Head Structure and Assembly
Source: PubMed Central journal article supplement (PMC5105663; doi:10.1128/jvi.01492-16), 2016-10-28
Supplement: JVI.01492-16_zjv999182100so1.pdf [file JVI.01492-16_zjv999182100so1.pdf]

**A new model for giant phage research: Identification of essential genes in the *Salmonella* giant phage SPN3US reveals novel insights regarding phage structure and biology.**

List of Supplementary Material

Table S1. Homologous proteins found in SPN3US, *Erwinia* phage phiEaH2, phage CR5 and *Pseudomonas* phage  $\phi$ KZ, as determined by CoreGenes

Table S2. Titers and reversion rates of SPN3US amber mutant candidates.

Table S3. Mutations detected in SPN3US amber mutants.

Table S4. Mass spectral counts obtained by GelCMS for the two amber mutants, 24/am11 (gp241-) and 64\_112am27 (gp64-/ gp112-), propagated on permissive (sup+) and non-permissive (sup-) strains of *Salmonella* Typhimurium (TT6675 and TT9079, respectively).

**Table S1. Homologous proteins found in SPN3US, *Erwinia* phage PhiEaH2, phage CR5 and *Pseudomonas* phage  $\phi$ KZ as determined by CoreGenes (<http://binf.gmu.edu:8080/CoreGenes3.5/BatchCoreGenes.html>). STR., refers to protein identified as part of the virion.**

| SPN3US    | SPN3US                                       | PhiEaH2                                      | CR5                                          | $\phi$ KZ                                    | phiKZ (additional homologs detected by PsiBlast) |
|-----------|----------------------------------------------|----------------------------------------------|----------------------------------------------|----------------------------------------------|--------------------------------------------------|
| <b>gp</b> | <b>JN641803</b>                              | <b>JX316028</b>                              | <b>JX094500</b>                              | <b>NC_004629</b>                             | <b>NC_004629</b>                                 |
| 7         | GI:349502718<br>PRODUCT:hypothetical protein | GI:402761512<br>PRODUCT:hypothetical protein | GI:398256211<br>PRODUCT:hypothetical protein |                                              |                                                  |
| 8         | GI:349502719<br>PRODUCT:hypothetical protein | GI:402761513<br>PRODUCT:hypothetical protein | GI:398256212<br>PRODUCT:hypothetical protein | GI:29134978<br>PRODUCT:ORF042<br><b>STR.</b> |                                                  |
| 11        | GI:349502722<br>PRODUCT:hypothetical protein | GI:402761514<br>PRODUCT:hypothetical protein | GI:398256215<br>PRODUCT:hypothetical protein |                                              |                                                  |
| 13        | GI:349502724<br>PRODUCT:hypothetical protein | GI:402761516<br>PRODUCT:hypothetical protein | GI:398256217<br>PRODUCT:hypothetical protein |                                              |                                                  |
| 14        | GI:349502725<br>PRODUCT:hypothetical protein | GI:402761517<br>PRODUCT:hypothetical protein | GI:398256218<br>PRODUCT:hypothetical protein |                                              |                                                  |
| 16        | GI:349502727<br>PRODUCT:hypothetical protein | GI:402761519<br>PRODUCT:hypothetical protein | GI:398256220<br>PRODUCT:hypothetical protein |                                              |                                                  |
| 17        | GI:349502728<br>PRODUCT:hypothetical protein | GI:402761520<br>PRODUCT:hypothetical protein | GI:398256221<br>PRODUCT:hypothetical protein |                                              | GI:29134985<br>PRODUCT:ORF049<br><b>STR.</b>     |
| 18        | GI:349502729<br>PRODUCT:hypothetical protein | GI:402761521<br>PRODUCT:hypothetical protein | GI:398256224<br>PRODUCT:hypothetical protein | GI:29134986<br>PRODUCT:ORF050                |                                                  |
| 20        | GI:349502731<br>PRODUCT:hypothetical protein | GI:402761522<br>PRODUCT:hypothetical protein | GI:398256313<br>PRODUCT:hypothetical protein |                                              |                                                  |

|    |                                                                             |                                                                                   |                                                                            |                                              |  |
|----|-----------------------------------------------------------------------------|-----------------------------------------------------------------------------------|----------------------------------------------------------------------------|----------------------------------------------|--|
| 21 | GI:349502732<br>PRODUCT:hypothetical protein                                | GI:402761524<br>PRODUCT:hypothetical protein                                      | GI:398256226<br>PRODUCT:hypothetical protein                               | GI:29134988<br>PRODUCT:ORF052<br><b>STR.</b> |  |
| 22 | GI:349502733<br>PRODUCT:hypothetical protein                                | GI:402761525<br>PRODUCT:hypothetical protein                                      | GI:398256227<br>PRODUCT:hypothetical protein                               |                                              |  |
| 23 | GI:349502734<br>PRODUCT:putative DNA-directed RNA polymerase beta subunit 1 | GI:402761526<br>PRODUCT:putative PHAGE DNA-directed RNA polymerase beta subunit 3 | GI:398256228<br>PRODUCT:putative DNA-directed RNA polymerase beta' subunit | GI:29134991<br>PRODUCT:ORF055                |  |
| 24 | GI:349502735<br>PRODUCT:hypothetical protein                                | GI:402761527<br>PRODUCT:hypothetical protein                                      | GI:398256229<br>PRODUCT:hypothetical protein                               | GI:29134995<br>PRODUCT:ORF059                |  |
| 25 | GI:349502736<br>PRODUCT:hypothetical protein                                | GI:402761528<br>PRODUCT:hypothetical protein                                      | GI:398256230<br>PRODUCT:hypothetical protein                               | GI:29134998<br>PRODUCT:ORF062<br><b>STR.</b> |  |
| 26 | GI:349502737<br>PRODUCT:hypothetical protein                                | GI:402761529<br>PRODUCT:hypothetical protein                                      | GI:398256231<br>PRODUCT:hypothetical protein                               |                                              |  |
| 27 | GI:349502738<br>PRODUCT:putative nuclease SbcCD D subunit                   | GI:402761530<br>PRODUCT:hypothetical protein                                      | GI:398256232<br>PRODUCT:putative nuclease SbcCD D subunit                  | GI:29135001<br>PRODUCT:ORF065                |  |
| 28 | GI:349502739<br>PRODUCT:hypothetical protein                                | GI:402761531<br>PRODUCT:hypothetical protein                                      | GI:398256233<br>PRODUCT:hypothetical protein                               | GI:29135002<br>PRODUCT:ORF066<br><b>STR.</b> |  |
| 29 | GI:349502740<br>PRODUCT:hypothetical protein                                | GI:402761532<br>PRODUCT:hypothetical protein                                      | GI:398256234<br>PRODUCT:hypothetical protein                               | GI:29135003<br>PRODUCT:ORF067                |  |
| 30 | GI:349502741<br>PRODUCT:hypothetical protein                                | GI:402761533<br>PRODUCT:hypothetical protein                                      | GI:398256235<br>PRODUCT:hypothetical protein                               | GI:29135004<br>PRODUCT:ORF068                |  |

|    |                                                                             |                                                                   |                                                                              |                               |                                                                                              |
|----|-----------------------------------------------------------------------------|-------------------------------------------------------------------|------------------------------------------------------------------------------|-------------------------------|----------------------------------------------------------------------------------------------|
| 31 | GI:349502742<br>PRODUCT:hypothetical protein                                | GI:402761534<br>PRODUCT:hypothetical protein                      | GI:398256236<br>PRODUCT:hypothetical protein                                 |                               |                                                                                              |
| 32 | GI:349502743<br>PRODUCT:hypothetical protein                                | GI:402761535<br>PRODUCT:hypothetical protein                      | GI:398256237<br>PRODUCT:hypothetical protein                                 | GI:29135006<br>PRODUCT:ORF070 |                                                                                              |
| 33 | GI:349502744<br>PRODUCT:hypothetical protein                                | GI:402761536<br>PRODUCT:hypothetical protein                      | GI:398256238<br>PRODUCT:hypothetical protein                                 |                               | PhiKZ 70_2<br>small frame<br>homologous to<br>201φ2-1p127<br>(YP_001956851.1)<br><b>STR.</b> |
| 34 | GI:349502745<br>PRODUCT:putative DNA-directed RNA polymerase beta subunit 2 | GI:402761537<br>PRODUCT:hypothetical protein                      | GI:398256239<br>PRODUCT:putative DNA-directed RNA polymerase beta subunit 1  | GI:29135007<br>PRODUCT:ORF071 |                                                                                              |
| 35 | GI:349502746<br>PRODUCT:putative DNA-directed RNA polymerase beta' subunit  | GI:402761539<br>PRODUCT:hypothetical protein                      | GI:398256240<br>PRODUCT:putative DNA-directed RNA polymerase beta' subunit 1 | GI:29135010<br>PRODUCT:ORF074 |                                                                                              |
| 36 | GI:349502747<br>PRODUCT:hypothetical protein                                | GI:402761540<br>PRODUCT:phage putative ATP-dependent DNA helicase | GI:398256241<br>PRODUCT:putative helicase                                    | GI:29135011<br>PRODUCT:ORF075 |                                                                                              |
| 37 | GI:349502748<br>PRODUCT:hypothetical protein                                | GI:402761541<br>PRODUCT:hypothetical protein                      | GI:398256242<br>PRODUCT:hypothetical protein                                 |                               |                                                                                              |
| 38 | GI:349502749<br>PRODUCT:hypothetical protein                                | GI:402761542<br>PRODUCT:hypothetical protein                      | GI:398256243<br>PRODUCT:hypothetical protein                                 |                               |                                                                                              |
| 39 | GI:349502750<br>PRODUCT:hypothetical protein                                | GI:402761543<br>PRODUCT:hypothetical protein                      | GI:398256244<br>PRODUCT:hypothetical protein                                 | GI:29135013<br>PRODUCT:ORF077 |                                                                                              |

|    |                                                                             |                                                                      |                                                                              |                                              |  |
|----|-----------------------------------------------------------------------------|----------------------------------------------------------------------|------------------------------------------------------------------------------|----------------------------------------------|--|
| 40 | GI:349502751<br>PRODUCT:hypothetical protein                                | GI:402761544<br>PRODUCT:hypothetical protein                         | GI:398256245<br>PRODUCT:hypothetical protein                                 |                                              |  |
| 41 | GI:349502752<br>PRODUCT:hypothetical protein                                | GI:402761545<br>PRODUCT:hypothetical protein                         | GI:398256246<br>PRODUCT:hypothetical protein                                 |                                              |  |
| 42 | GI:349502753<br>PRODUCT:putative DNA-directed RNA polymerase beta subunit 3 | GI:402761546<br>PRODUCT:phage putative RNA polymerase beta subunit 3 | GI:398256247<br>PRODUCT:putative DNA-directed RNA polymerase beta' subunit 2 | GI:29135016<br>PRODUCT:ORF080<br><b>STR.</b> |  |
| 43 | GI:349502754<br>PRODUCT:hypothetical protein                                | GI:402761547<br>PRODUCT:hypothetical protein                         | GI:398256248<br>PRODUCT:hypothetical protein                                 |                                              |  |
| 44 | GI:349502755<br>PRODUCT:hypothetical protein                                | GI:402761548<br>PRODUCT:hypothetical protein                         | GI:398256249<br>PRODUCT:hypothetical protein                                 | GI:29135018<br>PRODUCT:ORF082                |  |
| 45 | GI:349502756<br>PRODUCT:putative virion structural protein 1                | GI:402761549<br>PRODUCT:putative phage virion structural protein     | GI:398256250<br>PRODUCT:putative virion structural protein 1                 | GI:29135020<br>PRODUCT:ORF084<br><b>STR.</b> |  |
| 46 | GI:349502757<br>PRODUCT:hypothetical protein                                | GI:402761551<br>PRODUCT:hypothetical protein                         | GI:398256251<br>PRODUCT:hypothetical protein                                 |                                              |  |
| 47 | GI:349502758<br>PRODUCT:hypothetical protein                                | GI:402761552<br>PRODUCT:hypothetical protein                         | GI:398256252<br>PRODUCT:hypothetical protein                                 |                                              |  |
| 48 | GI:349502759<br>PRODUCT:putative virion structural protein 2                | GI:402761553<br>PRODUCT:phage virion structural protein              | GI:398256253<br>PRODUCT:putative virion structural protein 2                 | GI:29135023<br>PRODUCT:ORF087<br><b>STR.</b> |  |
| 49 | GI:349502760<br>PRODUCT:putative virion structural protein                  | GI:402761554<br>PRODUCT:phage virion structural protein              | GI:398256254<br>PRODUCT:putative virion structural protein 3                 | GI:29135024<br>PRODUCT:ORF088<br><b>STR.</b> |  |

|    |                                                                    |                                                            |                                                                 |                                              |                                                                                                     |
|----|--------------------------------------------------------------------|------------------------------------------------------------|-----------------------------------------------------------------|----------------------------------------------|-----------------------------------------------------------------------------------------------------|
|    | 3                                                                  |                                                            |                                                                 |                                              |                                                                                                     |
| 50 | GI:349502761<br>PRODUCT:putative<br>virion structural protein<br>4 | GI:402761555<br>PRODUCT:phage virion<br>structural protein | GI:398256255<br>PRODUCT:putative<br>virion structural protein 4 | GI:29135025<br>PRODUCT:ORF089<br><b>STR.</b> |                                                                                                     |
| 51 | GI:349502762<br>PRODUCT:putative<br>virion structural protein<br>5 | GI:402761556<br>PRODUCT:phage virion<br>structural protein | GI:398256256<br>PRODUCT:putative<br>virion structural protein 5 | GI:29135026<br>PRODUCT:ORF090<br><b>STR.</b> |                                                                                                     |
| 52 | GI:349502763<br>PRODUCT:hypothetical<br>protein                    | GI:402761557<br>PRODUCT:hypothetical<br>protein            | GI:398256257<br>PRODUCT:hypothetical<br>protein                 |                                              |                                                                                                     |
| 53 | GI:349502764<br>PRODUCT:hypothetical<br>protein                    | GI:402761558<br>PRODUCT:hypothetical<br>protein            | GI:398256258<br>PRODUCT:hypothetical<br>protein                 |                                              | gp54 is paralog of<br>gp53, both gp53 and<br>φKZ gp93 are<br>members of<br>pfam12699<br><b>STR.</b> |
| 54 | GI:349502765<br>PRODUCT:hypothetical<br>protein                    | GI:402761559<br>PRODUCT:hypothetical<br>protein            | GI:398256259<br>PRODUCT:hypothetical<br>protein                 | GI:29134971<br>PRODUCT:ORF035                | pfam12699<br><b>STR.</b>                                                                            |
| 58 | GI:349502769<br>PRODUCT:putative<br>dihydrofolate reductase        |                                                            |                                                                 | GI:29134940<br>PRODUCT:ORF004                |                                                                                                     |
| 61 | GI:349502772<br>PRODUCT:hypothetical<br>protein                    | GI:402761566<br>PRODUCT:hypothetical<br>protein            | GI:398256263<br>PRODUCT:hypothetical<br>protein                 | GI:29135034<br>PRODUCT:ORF098<br><b>STR.</b> |                                                                                                     |
| 62 | GI:349502773<br>PRODUCT:putative<br>virion structural protein<br>6 | GI:402761567<br>PRODUCT:phage virion<br>structural protein | GI:398256264<br>PRODUCT:putative<br>virion structural protein 6 | GI:29135035<br>PRODUCT:ORF099<br><b>STR.</b> |                                                                                                     |

|    |                                                              |                                                    |                                                              |                                              |  |
|----|--------------------------------------------------------------|----------------------------------------------------|--------------------------------------------------------------|----------------------------------------------|--|
| 63 | GI:349502774<br>PRODUCT:hypothetical protein                 | GI:402761568<br>PRODUCT:hypothetical protein       | GI:398256265<br>PRODUCT:hypothetical protein                 |                                              |  |
| 64 | GI:349502775<br>PRODUCT:putative virion structural protein 7 | GI:402761569<br>PRODUCT:hypothetical protein       | GI:398256266<br>PRODUCT:putative virion structural protein 7 | GI:29135037<br>PRODUCT:ORF101<br><b>STR.</b> |  |
| 65 | GI:349502776<br>PRODUCT:hypothetical protein                 | GI:402761570<br>PRODUCT:hypothetical protein       | GI:398256267<br>PRODUCT:hypothetical protein                 |                                              |  |
| 73 | GI:349502784<br>PRODUCT:putative helicase                    | GI:402761579<br>PRODUCT:phage putative helicase    | GI:398256273<br>PRODUCT:putative helicase                    | GI:29135054<br>PRODUCT:ORF118                |  |
| 74 | GI:349502785<br>PRODUCT:hypothetical protein                 | GI:402761580<br>PRODUCT:hypothetical protein       | GI:398256274<br>PRODUCT:hypothetical protein                 |                                              |  |
| 75 | GI:349502786<br>PRODUCT:putative major capsid protein        | GI:402761582<br>PRODUCT:phage major capsid protein | GI:398256275<br>PRODUCT:putative major capsid protein        | GI:29135056<br>PRODUCT:ORF120<br><b>STR.</b> |  |
| 76 | GI:349502787<br>PRODUCT:hypothetical protein                 | GI:402761584<br>PRODUCT:hypothetical protein       | GI:398256276<br>PRODUCT:hypothetical protein                 |                                              |  |
| 77 | GI:349502788<br>PRODUCT:hypothetical protein                 | GI:402761323<br>PRODUCT:hypothetical protein       | GI:398256277<br>PRODUCT:hypothetical protein                 | GI:29135059<br>PRODUCT:ORF123                |  |
| 78 | GI:349502789<br>PRODUCT:hypothetical protein                 | GI:402761324<br>PRODUCT:hypothetical protein       | GI:398256278<br>PRODUCT:hypothetical protein                 |                                              |  |
| 81 | GI:349502792<br>PRODUCT:putative virion structural protein 8 | GI:402761326<br>PRODUCT:hypothetical protein       | GI:398256279<br>PRODUCT:putative virion structural protein 8 | GI:29135065<br>PRODUCT:ORF129<br><b>STR.</b> |  |

|    |                                                                     |                                                               |                                                                     |                                              |                                              |
|----|---------------------------------------------------------------------|---------------------------------------------------------------|---------------------------------------------------------------------|----------------------------------------------|----------------------------------------------|
| 82 | GI:349502793<br>PRODUCT:putative<br>virion structural protein<br>9  | GI:402761327<br>PRODUCT:putative<br>virion structural protein | GI:398256280<br>PRODUCT:putative<br>virion structural protein 9     | GI:29135064<br>PRODUCT:ORF128<br><b>STR.</b> |                                              |
| 83 | GI:349502794<br>PRODUCT:hypothetical<br>protein                     | GI:402761328<br>PRODUCT:hypothetical<br>protein               | GI:398256281<br>PRODUCT:hypothetical<br>protein                     |                                              | GI:29135063<br>PRODUCT:ORF127<br><b>STR.</b> |
| 84 | GI:349502795<br>PRODUCT:putative<br>virion structural protein<br>10 | GI:402761329<br>PRODUCT:putative<br>virion structural protein | GI:398256282<br>PRODUCT:putative<br>virion structural protein<br>10 | GI:29135075<br>PRODUCT:ORF139<br><b>STR.</b> |                                              |
| 85 | GI:349502796<br>PRODUCT:hypothetical<br>protein                     | GI:402761330<br>PRODUCT:hypothetical<br>protein               | GI:398256283<br>PRODUCT:hypothetical<br>protein                     | GI:29135076<br>PRODUCT:ORF140                |                                              |
| 86 | GI:349502797<br>PRODUCT:hypothetical<br>protein                     | GI:402761331<br>PRODUCT:hypothetical<br>protein               | GI:398256284<br>PRODUCT:hypothetical<br>protein                     |                                              |                                              |
| 88 | GI:349502799<br>PRODUCT:putative<br>acetyltransferase               | GI:402761333<br>PRODUCT:putative<br>acetyltransferase         | GI:398256286<br>PRODUCT:putative<br>acetyltransferase               |                                              |                                              |
| 89 | GI:349502800<br>PRODUCT:hypothetical<br>protein                     | GI:402761334<br>PRODUCT:hypothetical<br>protein               | GI:398256287<br>PRODUCT:hypothetical<br>protein                     |                                              |                                              |
| 91 | GI:349502802<br>PRODUCT:hypothetical<br>protein                     | GI:402761336<br>PRODUCT:hypothetical<br>protein               | GI:398256289<br>PRODUCT:hypothetical<br>protein                     |                                              |                                              |
| 92 | GI:349502803<br>PRODUCT:hypothetical<br>protein                     | GI:402761337<br>PRODUCT:hypothetical<br>protein               | GI:398256290<br>PRODUCT:hypothetical<br>protein                     |                                              | GI:29135143<br>PRODUCT:ORF207                |
| 93 | GI:349502804<br>PRODUCT:hypothetical<br>protein                     | GI:402761338<br>PRODUCT:hypothetical<br>protein               | GI:398256292<br>PRODUCT:hypothetical<br>protein                     |                                              |                                              |



|     |                                                                |                                                                |                                                                                |                                              |  |
|-----|----------------------------------------------------------------|----------------------------------------------------------------|--------------------------------------------------------------------------------|----------------------------------------------|--|
| 94  | GI:349502805<br>PRODUCT:hypothetical protein                   | GI:402761339<br>PRODUCT:hypothetical protein                   | GI:398256297<br>PRODUCT:hypothetical protein                                   |                                              |  |
| 95  | GI:349502806<br>PRODUCT:putative GNAT family acetyltransferase | GI:402761341<br>PRODUCT:putative GNAT family acetyltransferase | GI:398256298<br>PRODUCT:putative ribosomal-protein-alanine N-acetyltransferase |                                              |  |
| 98  | GI:349502809<br>PRODUCT:hypothetical protein                   | GI:402761343<br>PRODUCT:hypothetical protein                   | GI:398256301<br>PRODUCT:hypothetical protein                                   |                                              |  |
| 100 | GI:349502811<br>PRODUCT:putative thymidylate kinase            | GI:402761346<br>PRODUCT:putative thymidylate kinase            | GI:398256302<br>PRODUCT:putative thymidylate kinase                            |                                              |  |
| 108 | GI:349502819<br>PRODUCT:hypothetical protein                   | GI:402761352<br>PRODUCT:hypothetical protein                   | GI:398256306<br>PRODUCT:hypothetical protein                                   |                                              |  |
| 109 | GI:349502820<br>PRODUCT:hypothetical protein                   | GI:402761353<br>PRODUCT:hypothetical protein                   | GI:398256323<br>PRODUCT:hypothetical protein                                   |                                              |  |
| 115 | GI:349502826<br>PRODUCT:hypothetical protein                   | GI:402761359<br>PRODUCT:hypothetical protein                   | GI:398256327<br>PRODUCT:hypothetical protein                                   |                                              |  |
| 118 | GI:349502829<br>PRODUCT:hypothetical protein                   | GI:402761362<br>PRODUCT:hypothetical protein                   | GI:398256329<br>PRODUCT:hypothetical protein                                   |                                              |  |
| 120 | GI:349502831<br>PRODUCT:hypothetical protein                   | GI:402761364<br>PRODUCT:hypothetical protein                   | GI:398256333<br>PRODUCT:hypothetical protein                                   | GI:29135087<br>PRODUCT:ORF151                |  |
| 127 | GI:349502838<br>PRODUCT:hypothetical protein                   | GI:402761367<br>PRODUCT:hypothetical protein                   | GI:398256334<br>PRODUCT:hypothetical protein                                   |                                              |  |
| 138 | GI:349502849<br>PRODUCT:hypothetical protein                   | GI:402761380<br>PRODUCT:putative virion structural protein     | GI:398256338<br>PRODUCT:hypothetical protein                                   | GI:29135062<br>PRODUCT:ORF126<br><b>STR.</b> |  |

|     |                                                               |                                                            |                                                               |                                    |                                    |
|-----|---------------------------------------------------------------|------------------------------------------------------------|---------------------------------------------------------------|------------------------------------|------------------------------------|
| 139 | GI:349502850<br>PRODUCT:hypothetical protein                  | GI:402761381<br>PRODUCT:putative virion structural protein | GI:398256339<br>PRODUCT:hypothetical protein                  |                                    | GI:29135063<br>PRODUCT:ORF127 STR. |
| 140 | GI:349502851<br>PRODUCT:putative virion structural protein 11 | GI:402761382<br>PRODUCT:putative virion structural protein | GI:398256340<br>PRODUCT:putative virion structural protein 11 | GI:29135063<br>PRODUCT:ORF127 STR. |                                    |
| 141 | GI:349502852<br>PRODUCT:hypothetical protein                  | GI:402761383<br>PRODUCT:putative virion structural protein | GI:398256341<br>PRODUCT:hypothetical protein                  | GI:29135031<br>PRODUCT:ORF095 STR. |                                    |
| 142 | GI:349502853<br>PRODUCT:hypothetical protein                  | GI:402761384<br>PRODUCT:hypothetical protein               | GI:398256344<br>PRODUCT:hypothetical protein                  |                                    | GI:29135063<br>PRODUCT:ORF127 STR. |
| 143 | GI:349502854<br>PRODUCT:hypothetical protein                  | GI:402761385<br>PRODUCT:putative virion structural protein | GI:398256343<br>PRODUCT:hypothetical protein                  |                                    | GI:29135063<br>PRODUCT:ORF127 STR. |
| 144 | GI:349502855<br>PRODUCT:hypothetical protein                  | GI:402761386<br>PRODUCT:hypothetical protein               | GI:398256346<br>PRODUCT:hypothetical protein                  |                                    | GI:29135063<br>PRODUCT:ORF127 STR. |
| 145 | GI:349502856<br>PRODUCT:putative virion structural protein 12 |                                                            |                                                               | GI:29135019<br>PRODUCT:ORF083 STR. |                                    |
| 146 | GI:349502857<br>PRODUCT:putative virion structural protein 13 | GI:402761388<br>PRODUCT:putative virion structural protein | GI:398256350<br>PRODUCT:putative virion structural protein 13 |                                    | GI:29135019<br>PRODUCT:ORF083 STR. |
| 147 | GI:349502858<br>PRODUCT:putative virion structural protein 14 |                                                            |                                                               |                                    | GI:29135019<br>PRODUCT:ORF083 STR. |

|     |                                                                     |                                                               |                                                                     |  |                                              |
|-----|---------------------------------------------------------------------|---------------------------------------------------------------|---------------------------------------------------------------------|--|----------------------------------------------|
| 148 | GI:349502859<br>PRODUCT:putative<br>virion structural protein<br>15 | GI:402761393<br>PRODUCT:putative<br>virion structural protein | GI:398256349<br>PRODUCT:putative<br>virion structural protein<br>12 |  | GI:29135019<br>PRODUCT:ORF083<br><b>STR.</b> |
| 149 | GI:349502860<br>PRODUCT:hypothetical<br>protein                     |                                                               |                                                                     |  | GI:29135019<br>PRODUCT:ORF083<br><b>STR.</b> |
| 150 | GI:349502861<br>PRODUCT:putative<br>virion structural protein<br>16 | GI:402761392<br>PRODUCT:putative<br>virion structural protein | GI:398256351<br>PRODUCT:putative<br>virion structural protein<br>14 |  | GI:29135019<br>PRODUCT:ORF083<br><b>STR.</b> |
| 151 | GI:349502862<br>PRODUCT:putative<br>virion structural protein<br>17 |                                                               |                                                                     |  | GI:29135019<br>PRODUCT:ORF083<br><b>STR.</b> |
| 152 | GI:349502863<br>PRODUCT:putative<br>virion structural protein<br>18 |                                                               |                                                                     |  | GI:29135019<br>PRODUCT:ORF083<br><b>STR.</b> |
| 153 | GI:349502863<br>PRODUCT:putative<br>virion structural protein<br>19 |                                                               |                                                                     |  | GI:29135019<br>PRODUCT:ORF083<br><b>STR.</b> |
| 154 | GI:349502864<br>PRODUCT:hypothetical<br>protein                     |                                                               |                                                                     |  | GI:29135063<br>PRODUCT:ORF127<br><b>STR.</b> |
| 157 | GI:349502868<br>PRODUCT:hypothetical<br>protein                     | GI:402761398<br>PRODUCT:phage tail<br>assembly-like protein   | GI:398256354<br>PRODUCT:hypothetical<br>protein                     |  |                                              |
| 160 | GI:349502871<br>PRODUCT:hypothetical<br>protein                     | GI:402761400<br>PRODUCT:hypothetical<br>protein               | GI:398256352<br>PRODUCT:hypothetical<br>protein                     |  |                                              |

|     |                                                                    |                                                                    |                                                                    |                                              |  |
|-----|--------------------------------------------------------------------|--------------------------------------------------------------------|--------------------------------------------------------------------|----------------------------------------------|--|
| 161 | GI:349502872<br>PRODUCT:hypothetical protein                       | GI:402761402<br>PRODUCT:hypothetical protein                       | GI:398256355<br>PRODUCT:hypothetical protein                       |                                              |  |
| 162 | GI:349502873<br>PRODUCT:hypothetical protein                       | GI:402761403<br>PRODUCT:hypothetical protein                       | GI:398256356<br>PRODUCT:hypothetical protein                       |                                              |  |
| 163 | GI:349502874<br>PRODUCT:putative radical SAM superfamily protein 1 | GI:402761404<br>PRODUCT:putative radical SAM superfamily protein   | GI:398256357<br>PRODUCT:putative radical SAM superfamily protein 1 |                                              |  |
| 164 | GI:349502875<br>PRODUCT:putative radical SAM superfamily protein 2 | GI:402761405<br>PRODUCT:putative radical SAM superfamily protein 2 | GI:398256358<br>PRODUCT:putative radical SAM superfamily protein 2 |                                              |  |
| 165 | GI:349502876<br>PRODUCT:hypothetical protein                       | GI:402761406<br>PRODUCT:hypothetical protein                       | GI:398256359<br>PRODUCT:hypothetical protein                       |                                              |  |
| 167 | GI:349502878<br>PRODUCT:putative virion structural protein 20      | GI:402761410<br>PRODUCT:putative virion structural protein         | GI:398256362<br>PRODUCT:putative virion structural protein 15      | GI:29135070<br>PRODUCT:ORF134<br><b>STR.</b> |  |
| 168 | GI:349502879<br>PRODUCT:hypothetical protein                       | GI:402761411<br>PRODUCT:hypothetical protein                       | GI:398256363<br>PRODUCT:hypothetical protein                       | GI:29135081<br>PRODUCT:ORF145<br><b>STR.</b> |  |
| 169 | GI:349502880<br>PRODUCT:hypothetical protein                       | GI:402761412<br>PRODUCT:hypothetical protein                       | GI:398256364<br>PRODUCT:hypothetical protein                       | GI:29135069<br>PRODUCT:ORF133<br><b>STR.</b> |  |
| 170 | GI:349502881<br>PRODUCT:hypothetical protein                       | GI:402761413<br>PRODUCT:hypothetical protein                       | GI:398256365<br>PRODUCT:hypothetical protein                       | GI:29135067<br>PRODUCT:ORF131<br><b>STR.</b> |  |
| 171 | GI:349502882<br>PRODUCT:hypothetical protein                       | GI:402761414<br>PRODUCT:hypothetical protein                       | GI:398256366<br>PRODUCT:hypothetical protein                       | GI:29135066<br>PRODUCT:ORF130<br><b>STR.</b> |  |

|     |                                                                |                                                                |                                                                |                                              |                                      |
|-----|----------------------------------------------------------------|----------------------------------------------------------------|----------------------------------------------------------------|----------------------------------------------|--------------------------------------|
| 172 | GI:349502883<br>PRODUCT:hypothetical protein                   | GI:402761415<br>PRODUCT:hypothetical protein                   | GI:398256367<br>PRODUCT:hypothetical protein                   |                                              |                                      |
| 173 | GI:349502884<br>PRODUCT:putative structural protein            | GI:402761416<br>PRODUCT:putative structural protein            | GI:398256368<br>PRODUCT:putative structural protein            | GI:29135100<br>PRODUCT:ORF164<br><b>STR.</b> |                                      |
| 175 | GI:349502886<br>PRODUCT:hypothetical protein                   | GI:402761418<br>PRODUCT:hypothetical protein                   | GI:398256369<br>PRODUCT:hypothetical protein                   |                                              |                                      |
| 183 | GI:349502894<br>PRODUCT:hypothetical protein                   | GI:402761428<br>PRODUCT:hypothetical protein                   | GI:398256409<br>PRODUCT:hypothetical protein                   |                                              |                                      |
| 186 | GI:349502897<br>PRODUCT:putative SMC domain-containing protein | GI:402761431<br>PRODUCT:putative SMC domain-containing protein | GI:398256374<br>PRODUCT:putative SMC domain-containing protein | GI:29135101<br>PRODUCT:ORF165                |                                      |
| 196 | GI:349502907<br>PRODUCT:hypothetical protein                   | GI:402761440<br>PRODUCT:hypothetical protein                   | GI:398256381<br>PRODUCT:hypothetical protein                   | GI:29135040<br>PRODUCT:ORF104                |                                      |
| 198 | GI:349502909<br>PRODUCT:putative endolysin                     | GI:402761441<br>PRODUCT:putative endolysin                     | GI:398256382<br>PRODUCT:putative endolysin                     |                                              | GI:29135080<br>PRODUCT:<br>endolysin |
| 199 | GI:349502910<br>PRODUCT:hypothetical protein                   | GI:402761442<br>PRODUCT:hypothetical protein                   | GI:398256383<br>PRODUCT:hypothetical protein                   |                                              |                                      |
| 202 | GI:349502913<br>PRODUCT:hypothetical protein                   | GI:402761444<br>PRODUCT:hypothetical protein                   | GI:398256385<br>PRODUCT:hypothetical protein                   | GI:29135097<br>PRODUCT:ORF161<br><b>STR.</b> |                                      |
| 203 | GI:349502914<br>PRODUCT:putative virion structural protein 21  | GI:402761445<br>PRODUCT:putative virion structural protein     | GI:398256386<br>PRODUCT:putative virion structural protein 16  | GI:29135093<br>PRODUCT:ORF157<br><b>STR.</b> |                                      |

|     |                                                               |                                                        |                                                               |                                              |                               |
|-----|---------------------------------------------------------------|--------------------------------------------------------|---------------------------------------------------------------|----------------------------------------------|-------------------------------|
| 204 | GI:349502915<br>PRODUCT:hypothetical protein                  | GI:402761446<br>PRODUCT:hypothetical protein           | GI:398256387<br>PRODUCT:hypothetical protein                  |                                              |                               |
| 205 | GI:349502916<br>PRODUCT:hypothetical protein                  | GI:402761447<br>PRODUCT:hypothetical protein           | GI:398256388<br>PRODUCT:hypothetical protein                  |                                              | GI:29135092<br>PRODUCT:ORF156 |
| 206 | GI:349502917<br>PRODUCT:putative endodeoxyribonuclease        | GI:402761448<br>PRODUCT:putative endodeoxyribonuclease | GI:398256389<br>PRODUCT:putative endodeoxyribonuclease        |                                              |                               |
| 207 | GI:349502918<br>PRODUCT:putative ribonuclease H               | GI:402761449<br>PRODUCT:putative ribonuclease H        | GI:398256390<br>PRODUCT:putative ribonuclease H               | GI:29135091<br>PRODUCT:ORF155                |                               |
| 209 | GI:349502920<br>PRODUCT:hypothetical protein                  | GI:402761451<br>PRODUCT:hypothetical protein           | GI:398256391<br>PRODUCT:hypothetical protein                  |                                              |                               |
| 212 | GI:349502923<br>PRODUCT:hypothetical protein                  | GI:402761455<br>PRODUCT:hypothetical protein           | GI:398256393<br>PRODUCT:hypothetical protein                  |                                              |                               |
| 214 | GI:349502925<br>PRODUCT:hypothetical protein                  | GI:402761458<br>PRODUCT:hypothetical protein           | GI:398256394<br>PRODUCT:hypothetical protein                  | GI:29135089<br>PRODUCT:ORF153<br><b>STR.</b> |                               |
| 216 | GI:349502927<br>PRODUCT:hypothetical protein                  | GI:402761460<br>PRODUCT:hypothetical protein           | GI:398256395<br>PRODUCT:hypothetical protein                  | GI:29135088<br>PRODUCT:ORF152                |                               |
| 218 | GI:349502929<br>PRODUCT:putative virion structural protein 22 | GI:402761461<br>PRODUCT:hypothetical protein           | GI:398256397<br>PRODUCT:putative virion structural protein 17 | GI:29135085<br>PRODUCT:ORF149<br><b>STR.</b> |                               |
| 219 | GI:349502930<br>PRODUCT:hypothetical protein                  | GI:402761344<br>PRODUCT:hypothetical protein           | GI:398256398<br>PRODUCT:hypothetical protein                  | GI:29135083<br>PRODUCT:ORF147                |                               |
| 220 | GI:349502931<br>PRODUCT:hypothetical protein                  |                                                        |                                                               | GI:29135105<br>PRODUCT:ORF169                |                               |

|     |                                              |                                              |                                              |                                              |                                              |
|-----|----------------------------------------------|----------------------------------------------|----------------------------------------------|----------------------------------------------|----------------------------------------------|
| 221 | GI:349502932<br>PRODUCT:hypothetical protein | GI:402761463<br>PRODUCT:hypothetical protein | GI:398256400<br>PRODUCT:hypothetical protein |                                              |                                              |
| 222 | GI:349502933<br>PRODUCT:hypothetical protein | GI:402761464<br>PRODUCT:hypothetical protein | GI:398256401<br>PRODUCT:hypothetical protein |                                              |                                              |
| 223 | GI:349502934<br>PRODUCT:hypothetical protein | GI:402761465<br>PRODUCT:hypothetical protein | GI:398256402<br>PRODUCT:hypothetical protein | GI:29135110<br>PRODUCT:ORF174<br><b>STR.</b> |                                              |
| 224 | GI:349502935<br>PRODUCT:hypothetical protein | GI:402761466<br>PRODUCT:hypothetical protein | GI:398256403<br>PRODUCT:hypothetical protein |                                              |                                              |
| 225 | GI:349502936<br>PRODUCT:hypothetical protein | GI:402761467<br>PRODUCT:hypothetical protein | GI:398256404<br>PRODUCT:hypothetical protein |                                              |                                              |
| 229 | GI:349502940<br>PRODUCT:thymidylate synthase | GI:402761471<br>PRODUCT:thymidylate synthase | GI:398256311<br>PRODUCT:thymidylate synthase | GI:29135171<br>PRODUCT:ORF235                |                                              |
| 233 | GI:349502944<br>PRODUCT:hypothetical protein | GI:402761473<br>PRODUCT:hypothetical protein | GI:398256319<br>PRODUCT:hypothetical protein | GI:29135233<br>PRODUCT:ORF297                |                                              |
| 234 | GI:349502945<br>PRODUCT:hypothetical protein | GI:402761474<br>PRODUCT:hypothetical protein | GI:398256317<br>PRODUCT:hypothetical protein |                                              |                                              |
| 235 | GI:349502946<br>PRODUCT:hypothetical protein | GI:402761475<br>PRODUCT:hypothetical protein | GI:398256320<br>PRODUCT:hypothetical protein |                                              |                                              |
| 237 | GI:349502948<br>PRODUCT:hypothetical protein |                                              |                                              |                                              | GI:29135063<br>PRODUCT:ORF127<br><b>STR.</b> |
| 238 | GI:349502949<br>PRODUCT:hypothetical protein | GI:402761479<br>PRODUCT:hypothetical protein | GI:398256410<br>PRODUCT:hypothetical protein | GI:29135118<br>PRODUCT:ORF182<br><b>STR.</b> |                                              |

|     |                                                                             |                                                                                   |                                                                             |                                           |  |
|-----|-----------------------------------------------------------------------------|-----------------------------------------------------------------------------------|-----------------------------------------------------------------------------|-------------------------------------------|--|
| 239 | GI:349502950<br>PRODUCT:putative tail fibre protein                         | GI:402761480<br>PRODUCT:putative phage tail fiber protein                         | GI:398256411<br>PRODUCT:putative tail fiber protein                         | GI:29135080<br>PRODUCT:ORF144 <b>STR.</b> |  |
| 240 | GI:349502951<br>PRODUCT:putative DNA-directed RNA polymerase beta subunit 4 | GI:402761481<br>PRODUCT:putative phage DNA-directed RNA polymerase beta subunit   | GI:398256412<br>PRODUCT:putative DNA-directed RNA polymerase beta subunit 2 | GI:29135116<br>PRODUCT:ORF180 <b>STR.</b> |  |
| 241 | GI:349502952<br>PRODUCT:putative DNA-directed RNA polymerase beta subunit 5 | GI:402761482<br>PRODUCT:putative phage DNA-directed RNA polymerase beta subunit 2 | GI:398256413<br>PRODUCT:putative DNA-directed RNA polymerase beta subunit 3 | GI:29135114<br>PRODUCT:ORF178 <b>STR.</b> |  |
| 242 | GI:349502953<br>PRODUCT:hypothetical protein                                | GI:402761483<br>PRODUCT:hypothetical protein                                      | GI:398256414<br>PRODUCT:hypothetical protein                                |                                           |  |
| 243 | GI:349502954<br>PRODUCT:hypothetical protein                                | GI:402761484<br>PRODUCT:hypothetical protein                                      | GI:398256415<br>PRODUCT:hypothetical protein                                | GI:29135113<br>PRODUCT:ORF177 <b>STR.</b> |  |
| 244 | GI:349502955<br>PRODUCT:hypothetical protein                                | GI:402761485<br>PRODUCT:hypothetical protein                                      | GI:398256416<br>PRODUCT:hypothetical protein                                | GI:29135112<br>PRODUCT:ORF176 <b>STR.</b> |  |
| 245 | GI:349502956<br>PRODUCT:putative virion structural protein 23               | GI:402761486<br>PRODUCT:putative virion structural protein                        | GI:398256417<br>PRODUCT:putative virion structural protein 18               | GI:29135111<br>PRODUCT:ORF175 <b>STR.</b> |  |
| 246 | GI:349502957<br>PRODUCT:hypothetical protein                                | GI:402761487<br>PRODUCT:hypothetical protein                                      | GI:398256418<br>PRODUCT:hypothetical protein                                |                                           |  |
| 247 | GI:349502958<br>PRODUCT:hypothetical protein                                | GI:402761488<br>PRODUCT:hypothetical protein                                      | GI:398256419<br>PRODUCT:hypothetical protein                                |                                           |  |



|     |                                                               |                                                            |                                                               |                                              |  |
|-----|---------------------------------------------------------------|------------------------------------------------------------|---------------------------------------------------------------|----------------------------------------------|--|
| 248 | GI:349502959<br>PRODUCT:hypothetical protein                  | GI:402761489<br>PRODUCT:hypothetical protein               | GI:398256420<br>PRODUCT:hypothetical protein                  |                                              |  |
| 251 | GI:349502962<br>PRODUCT:putative HD domain protein            | GI:402761491<br>PRODUCT:putative phage HD domain protein   | GI:398256421<br>PRODUCT:putative HD domain protein            |                                              |  |
| 252 | GI:349502963<br>PRODUCT:hypothetical protein                  | GI:402761492<br>PRODUCT:hypothetical protein               | GI:398256422<br>PRODUCT:hypothetical protein                  |                                              |  |
| 255 | GI:349502966<br>PRODUCT:putative virion structural protein 24 | GI:402761494<br>PRODUCT:putative virion structural protein | GI:398256423<br>PRODUCT:putative virion structural protein 19 | GI:29134966<br>PRODUCT:ORF030<br><b>STR.</b> |  |
| 256 | GI:349502967<br>PRODUCT:putative tail sheath protein          | GI:402761495<br>PRODUCT:putative phage tail sheath protein | GI:398256424<br>PRODUCT:putative tail sheath protein          | GI:29134965<br>PRODUCT:ORF029<br><b>STR.</b> |  |
| 257 | GI:349502968<br>PRODUCT:hypothetical protein                  | GI:402761496<br>PRODUCT:hypothetical protein               | GI:398256425<br>PRODUCT:hypothetical protein                  | GI:29134964<br>PRODUCT:ORF028                |  |
| 258 | GI:349502969<br>PRODUCT:putative virion structural protein 25 | GI:402761497<br>PRODUCT:putative virion structural protein | GI:398256426<br>PRODUCT:putative virion structural protein 20 | GI:29134963<br>PRODUCT:ORF027<br><b>STR.</b> |  |
| 259 | GI:349502970<br>PRODUCT:putative virion structural protein 26 | GI:402761498<br>PRODUCT:putative virion structural protein | GI:398256427<br>PRODUCT:putative virion structural protein 21 | GI:29134962<br>PRODUCT:ORF026<br><b>STR.</b> |  |
| 260 | GI:349502971<br>PRODUCT:putative terminase large subunit      | GI:402761499<br>PRODUCT:terminase large subunit            | GI:398256428<br>PRODUCT:putative terminase large subunit      | GI:29134961<br>PRODUCT:ORF025                |  |
| 262 | GI:349502973<br>PRODUCT:hypothetical protein                  | GI:402761500<br>PRODUCT:hypothetical protein               | GI:398256433<br>PRODUCT:hypothetical protein                  | GI:29134968<br>PRODUCT:ORF032<br><b>STR.</b> |  |

|     |                                                 |                                                 |                                                 |  |  |
|-----|-------------------------------------------------|-------------------------------------------------|-------------------------------------------------|--|--|
| 263 | GI:349502974<br>PRODUCT:hypothetical<br>protein | GI:402761501<br>PRODUCT:hypothetical<br>protein | GI:398256434<br>PRODUCT:hypothetical<br>protein |  |  |
|-----|-------------------------------------------------|-------------------------------------------------|-------------------------------------------------|--|--|

Table S2. **Titers and reversion rates of SPN3US amber mutant candidates.** Suppressor strains tested were TT6675 (supD) and TT9079 transformed with pMN suppressor plasmids obtained from Dr. David Peabody, supS, supG and supA refer to serine, glycine and alanine suppressors respectively. Non-suppressor strains used for determination of reversion rate were UB0015 and TT9079.

| Amber No | Titer (pfu/ml) |                |                 |                 | Reversion rate |        |
|----------|----------------|----------------|-----------------|-----------------|----------------|--------|
|          | TT6675 (sup+)  | TT9079/pMNsups | TT9079/pMNsupsG | TT9079/pMNsupsA | UB0015         | TT9079 |
| 1        | 3.6E+12        | 2.4E+12        | 2.0E+11         | No growth       | <E-5           | <E-5   |
| 2        | 3.8E+12        | 4.6E+12        | 6.0E+11         | 4.0E+11         | <E-5           | <E-6   |
| 3        | 8.0E+11        | 5.4E+11        | 6.0E+10         | No growth       | <E-6           | <E-7   |
| 4        | 3.0E+11        | 3.2E+11        | 3.0E+10         | No growth       | <E-7           | E-7    |
| 5        | 2.0E+11        | 1.6E+11        | 2.0E+10         | No growth       | <E-7           | <E-7   |
| 6        | 8.0E+11        | 2.4E+11        | 8.0E+10         | 3.2E+10         | <E-6           | E-6    |
| 7        | 5.0E+11        | 2.4E+11        | 2.0E+10         | No growth       | E-7            | E-5    |
| 8        | 2.0E+11        | 6.0E+10        | 1.0E+10         | No growth       | <E-6           | <E-6   |
| 9        | 3.6E+11        | 2.4E+11        | 2.0E+10         | No growth       | <E-6           | <E-6   |
| 10       | 1.0E+11        | 4.8E+11        | 1.0E+11         | 1.2E+11         | <E-6           | <E-6   |
| 11       | 2.6E+10        | 2.2E+11        | 1.0E+11         | 2.2E+10         | <E-5           | <E-5   |
| 12       | 2.2E+11        | 2.4E+11        | 6.0E+10         | 6.0E+10         | <E-6           | <E-6   |
| 13       | 2.4E+12        | ? E+11         | 1.0E+11         | turbid?         | <E-6           | <E-6   |
| 14       | 2.0E+11        | 1.0E+11        | 4.0E+11         | 1.6E+11         | <E-6           | <E-7   |
| 15       | 2.0E+11        | 2.0E+11        | 2.0E+10         | No growth       | <E-7           | E-7    |
| 16       | No growth      | No growth      | No growth       | No growth       |                |        |
| 17       | 2.2E+11        | 1.6E+11        | 4.0E+10         | No growth       | <E-5           | E-6    |
| 18       | 1.6E+12        | 7.0E+11        | No growth       | No growth       | <E-5           | E-7    |
| 19       | 1.0E+12        | 1.0E+12        | 1.4E+11         | No growth       | <E-5           | E-6    |
| 20       | 1.0E+12        | 5.2E+11        | 2.0E+11         | 1.8E+11         | E-6            | <E-6   |
| 21       | 1.8E+12        | 2.0E+11        | 4.0E+11         | 2.0E+11         | <E-6           | <E-6   |
| 22       | 1.8E+12        | 1.6E+12        | 2.0E+11         | No growth       | <E-7           | <E-7   |
| 23       | 1.8E+12        | 4.0E+12        | 8.0E+11         | No growth       | <E-7           | <E-7   |
| 24       | 1.0E+12        | 8.0E+11        | 4.0E+11         | No growth       | <E-7           | <E-7   |
| 25       | 1.0E+12        | 1.0E+12        | 2.0E+11         | 1.6E+11         | <E-6           | <E-6   |
| 26       | 1.0E+12        | 8.0E+11        | 2.6E+11         | No growth       | E-7            | E-7    |
| 27       | 8.4E+11        | 5.6E+11        | 1.6E+11         | 4.0E+10         | <E-6           | E-4    |
| 28       | 1.6E+11        | 5.4E+11        | 3.0E+11         | No growth       | E-4            | E-4    |

|    |         |         |           |             |         |         |
|----|---------|---------|-----------|-------------|---------|---------|
| 29 | 2.0E+11 | 9.0E+11 | 3.0E+11   | No growth   | <E-5    | <E-5    |
| 30 | 1.2E+11 | 6.0E+11 | 3.0E+11   | 2.6E+11     | <E-4    | E-6     |
| 31 | 2.2E+11 | 8.4E+11 | 3.6E+11   | 1.6E+11     | <E-4    | <E-5    |
| 32 | 1.4E+11 | 5.8E+11 | 2.0E+11   | No growth   | <E-4    | <E-5    |
| 33 | 1.2E+11 | 5.4E+11 | 3.0E+11   | Turbid zone | <E-5    | <E-5    |
| 34 | 1.0E+11 | 5.2E+11 | 1.0E+11   | No growth   | <E-5    | <E-5    |
| 35 | 8.2E+11 | 4.8E+11 | 1.2E+11   | Turbid zone | <E-5    | <E-5    |
| 36 | 1.2E+11 | 6.2E+11 | 4.2E+11   | No growth   | <E-5    | E-6     |
| 37 | 1.2E+12 | 4.0E+11 | 6.0E+11   | 1.0E+11     | 1.7E-06 | 1.7E-06 |
| 38 | 1.2E+12 | 8.0E+11 | 3.6E+11   | 1.0E+11     | 1.7E-05 | 1.7E-05 |
| 39 | 2.0E+12 | 2.2E+12 | 2.0E+12   | No growth   | 1.0E-05 | 1.0E-05 |
| 40 | 1.4E+12 | 1.8E+12 | 6.0E+11   | No growth   | 1.4E-05 | E-5     |
| 41 | 1.4E+12 | 1.8E+12 | 6.0E+11   | 6.0E+10     | 1.4E-05 | 1.4E-05 |
| 42 | 3.6E+12 | 1.2E+12 | 2.0E+11   | 4.0E+11     | 1.6E-05 | 1.6E-05 |
| 43 | 1.6E+12 | 8.0E+11 | 2.6E+12   | 1.2E+12     | 1.3E-05 | 1.3E-06 |
| 44 | 4.4E+12 | 2.0E+12 | 4.0E+11   | 4.0E+11     | 5.0E-07 | 5.0E-07 |
| 45 | 3.6E+12 | 1.6E+12 | 1.4E+12   | 2.0E+10     | 1.6E-05 | 1.6E-05 |
| 46 | 4.6E+12 | 1.0E+12 | 8.0E+11   | No growth   | 4.3E-06 | 4.3E-06 |
| 47 | 3.6E+12 | 4.0E+12 | 1.6E+12   | 2.0E+11     | <E-6    | <E-7    |
| 48 | 9.6E+12 | 2.6E+12 | 1.2E+12   | No growth   | <E-6    | <E-7    |
| 49 | 2.0E+11 | 4.0E+11 | 1.0E+11   | 2.0E+11     | <E-6    | <E-6    |
| 50 | 4.6E+12 | 4.0E+11 | No growth | 1.0E+11     | <E-7    | <E-7    |
| 51 | 8.0E+11 | 8.0E+11 | 8.0E+10   | 4.0E+11     | <E-5    |         |

**Table S3. Mutations identified in SPN3US amber mutants.**

| <b>am1</b> | <b>Reference Position</b> | <b>Type</b> | <b>Reference Base</b> | <b>Called Base</b> | <b>Impact</b>  | <b>SNP %</b> | <b>P not ref</b> | <b>Q call</b> | <b>Feature Type</b> | <b>Feature Name</b> | <b>DNA Change</b> | <b>Amino Acid Change</b> |
|------------|---------------------------|-------------|-----------------------|--------------------|----------------|--------------|------------------|---------------|---------------------|---------------------|-------------------|--------------------------|
|            | 46330                     | SNP         | C                     | T                  | Nonsense       | 99.80%       | 100.00%          | 60            | CDS                 | SPN3US_0047         | c.1432C>T         | p.Q478.                  |
|            | 56866                     | SNP         | C                     | T                  | Synonymous     | 99.70%       | 100.00%          | 60            | CDS                 | SPN3US_0055         | c.504C>T          | p.T168T                  |
|            | 142448                    | SNP         | C                     | T                  | Non Synonymous | 99.40%       | 100.00%          | 60            | CDS                 | SPN3US_0165         | c.721G>A          | p.A241T                  |
|            | 187963                    | SNP         | G                     | A                  | Non Synonymous | 100.00%      | 100.00%          | 60            | CDS                 | SPN3US_0216         | c.13G>A           | p.A5T                    |
|            | 189706                    | SNP         | C                     | T                  | Synonymous     | 99.80%       | 100.00%          | 60            | CDS                 | SPN3US_0217         | c.216C>T          | p.Y72Y                   |
|            | 201785                    | SNP         | G                     | A                  | Non Synonymous | 99.60%       | 100.00%          | 60            | CDS                 | SPN3US_0235         | c.815G>A          | p.G272D                  |
|            | 239940                    | Ins         | -                     | T                  |                | 91.90%       | 100.00%          | 60            |                     |                     |                   |                          |
|            |                           |             |                       |                    |                |              |                  |               |                     |                     |                   |                          |
| <b>am2</b> | <b>Reference Position</b> | <b>Type</b> | <b>Reference Base</b> | <b>Called Base</b> | <b>Impact</b>  | <b>SNP %</b> | <b>P not ref</b> | <b>Q call</b> | <b>Feature Type</b> | <b>Feature Name</b> | <b>DNA Change</b> | <b>Amino Acid Change</b> |
|            | 320                       | SNP         | C                     | T                  |                | 99.50%       | 100.00%          | 60            |                     |                     |                   |                          |
|            | 63849                     | SNP         | C                     | T                  | Nonsense       | 99.60%       | 100.00%          | 60            | CDS                 | SPN3US_0064         | c.763C>T          | p.Q255.                  |
|            | 77968                     | Ins         | -                     | T                  |                | 85.30%       | 100.00%          | 60            |                     |                     |                   |                          |
|            | 93454                     | Ins         | -                     | T                  |                | 89.60%       | 100.00%          | 60            |                     |                     |                   |                          |
|            | 98358                     | SNP         | C                     | T                  | Non Synonymous | 99.90%       | 100.00%          | 60            | CDS                 | SPN3US_0106         | c.680C>T          | p.A227V                  |
|            | 103056                    | SNP         | G                     | A                  | Non Synonymous | 100.00%      | 100.00%          | 60            | CDS                 | SPN3US_0116         | c.173G>A          | p.R58H                   |
|            | 122733                    | SNP         | G                     | A                  | Non Synonymous | 99.90%       | 100.00%          | 60            | CDS                 | SPN3US_0145         | c.1216G>A         | p.V406M                  |
|            | 239933                    | Ins         | -                     | T                  |                | 82.90%       | 100.00%          | 60            |                     |                     |                   |                          |
|            |                           |             |                       |                    |                |              |                  |               |                     |                     |                   |                          |
| <b>am3</b> | <b>Reference Position</b> | <b>Type</b> | <b>Reference Base</b> | <b>Called Base</b> | <b>Impact</b>  | <b>SNP %</b> | <b>P not ref</b> | <b>Q call</b> | <b>Feature Type</b> | <b>Feature Name</b> | <b>DNA Change</b> | <b>Amino Acid</b>        |

|            |                               |             |                           |                        |                   |              |                      |                   |                         |                     |                       | <b>Change</b>                    |
|------------|-------------------------------|-------------|---------------------------|------------------------|-------------------|--------------|----------------------|-------------------|-------------------------|---------------------|-----------------------|----------------------------------|
|            | 77022                         | SNP         | C                         | T                      | Nonsense          | 99.60%       | 100.00%              | 60                | CDS                     | SPN3US_0078         | c.1459C>T             | p.Q487.                          |
|            | 89936                         | SNP         | C                         | T                      | Non<br>Synonymous | 99.80%       | 100.00%              | 60                | CDS                     | SPN3US_0094         | c.575C>T              | p.T192I                          |
|            | 91091                         | SNP         | C                         | T                      | Non<br>Synonymous | 99.60%       | 100.00%              | 60                | CDS                     | SPN3US_0096         | c.131C>T              | p.P44L                           |
|            | 131809                        | SNP         | C                         | T                      |                   | 99.50%       | 100.00%              | 60                |                         |                     |                       |                                  |
|            | 217260                        | SNP         | G                         | A                      | Non<br>Synonymous | 99.80%       | 100.00%              | 60                | CDS                     | SPN3US_0241         | c.3272G>A             | p.G1091D                         |
|            | 239933                        | Ins         | -                         | T                      |                   | 98.70%       | 100.00%              | 60                |                         |                     |                       |                                  |
|            |                               |             |                           |                        |                   |              |                      |                   |                         |                     |                       |                                  |
|            |                               |             |                           |                        |                   |              |                      |                   |                         |                     |                       |                                  |
| <b>am6</b> | <b>Reference<br/>Position</b> | <b>Type</b> | <b>Reference<br/>Base</b> | <b>Called<br/>Base</b> | <b>Impact</b>     | <b>SNP %</b> | <b>P not<br/>ref</b> | <b>Q<br/>call</b> | <b>Feature<br/>Type</b> | <b>Feature Name</b> | <b>DNA<br/>Change</b> | <b>Amino<br/>Acid<br/>Change</b> |
|            | 1398                          | SNP         | C                         | T                      | Synonymous        | 99.50%       | 100.00%              | 60                | CDS                     | SPN3US_0001         | c.213C>T              | p.G71G                           |
|            | 20159                         | SNP         | C                         | T                      | Nonsense          | 99.50%       | 100.00%              | 60                | CDS                     | SPN3US_0025         | c.184C>T              | p.Q62.                           |
|            | 29178                         | SNP         | C                         | T                      | Synonymous        | 99.80%       | 100.00%              | 60                | CDS                     | SPN3US_0034         | c.165C>T              | p.Y55Y                           |
|            | 42136                         | SNP         | C                         | T                      | Synonymous        | 99.60%       | 100.00%              | 60                | CDS                     | SPN3US_0044         | c.873G>A              | p.P291P                          |
|            | 45934                         | SNP         | G                         | A                      | Non<br>Synonymous | 99.10%       | 100.00%              | 60                | CDS                     | SPN3US_0047         | c.1036G>A             | p.D346N                          |
|            | 66329                         | SNP         | C                         | T                      | Non<br>Synonymous | 99.80%       | 100.00%              | 60                | CDS                     | SPN3US_0069         | c.272C>T              | p.P91L                           |
|            | 76751                         | SNP         | G                         | C                      | Synonymous        | 99.80%       | 100.00%              | 60                | CDS                     | SPN3US_0078         | c.1188G>C             | p.A396A                          |
|            | 77948                         | SNP         | C                         | T                      |                   | 99.70%       | 100.00%              | 60                |                         |                     |                       |                                  |
|            | 85090                         | SNP         | C                         | T                      | Non<br>Synonymous | 99.60%       | 100.00%              | 60                | CDS                     | SPN3US_0086         | c.113C>T              | p.T38I                           |
|            | 118020                        | SNP         | A                         | G                      | Non<br>Synonymous | 99.60%       | 100.00%              | 60                | CDS                     | SPN3US_0141         | c.100A>G              | p.T34A                           |
|            | 120459                        | SNP         | C                         | T                      | Synonymous        | 99.70%       | 100.00%              | 60                | CDS                     | SPN3US_0143         | c.708C>T              | p.S236S                          |
|            | 176950                        | SNP         | C                         | T                      | Non<br>Synonymous | 99.80%       | 100.00%              | 60                | CDS                     | SPN3US_0201         | c.202C>T              | p.R68C                           |
|            | 179383                        | SNP         | C                         | T                      | Non<br>Synonymous | 99.00%       | 100.00%              | 60                | CDS                     | SPN3US_0203         | c.571G>A              | p.G191R                          |

|             |                           |             |                       |                    |                |              |                  |               |                     |                     |                   |                          |
|-------------|---------------------------|-------------|-----------------------|--------------------|----------------|--------------|------------------|---------------|---------------------|---------------------|-------------------|--------------------------|
|             | 215102                    | SNP         | G                     | A                  | Non Synonymous | 99.80%       | 100.00%          | 60            | CDS                 | SPN3US_0241         | c.1114G>A         | p.A372T                  |
|             | 217208                    | SNP         | G                     | A                  | Non Synonymous | 99.30%       | 100.00%          | 60            | CDS                 | SPN3US_0241         | c.3220G>A         | p.D1074N                 |
|             | 234789                    | SNP         | G                     | A                  | Non Synonymous | 99.70%       | 100.00%          | 60            | CDS                 | SPN3US_0260         | c.427G>A          | p.E143K                  |
|             | 240249                    | SNP         | G                     | A                  |                | 99.40%       | 100.00%          | 60            |                     |                     |                   |                          |
|             |                           |             |                       |                    |                |              |                  |               |                     |                     |                   |                          |
| <b>am11</b> | <b>Reference Position</b> | <b>Type</b> | <b>Reference Base</b> | <b>Called Base</b> | <b>Impact</b>  | <b>SNP %</b> | <b>P not ref</b> | <b>Q call</b> | <b>Feature Type</b> | <b>Feature Name</b> | <b>DNA Change</b> | <b>Amino Acid Change</b> |
|             | 97805                     | SNP         | G                     | A                  | Non Synonymous | 99.60%       | 100.00%          | 60            | CDS                 | SPN3US_0106         | c.127G>A          | p.D43N                   |
|             | 111698                    | SNP         | C                     | T                  | Non Synonymous | 99.90%       | 100.00%          | 60            | CDS                 | SPN3US_0129         | c.191C>T          | p.S64L                   |
|             | 159949                    | SNP         | C                     | T                  | Non Synonymous | 99.20%       | 100.00%          | 60            | CDS                 | SPN3US_0171         | c.1211C>T         | p.A404V                  |
|             | 167489                    | SNP         | G                     | A                  | Synonymous     | 100.00%      | 100.00%          | 60            | CDS                 | SPN3US_0183         | c.381G>A          | p.Q127Q                  |
|             | 215999                    | SNP         | C                     | T                  | Nonsense       | 100.00%      | 100.00%          | 60            | CDS                 | SPN3US_0241         | c.2011C>T         | p.Q671.                  |
|             | 223314                    | SNP         | C                     | T                  |                | 100.00%      | 100.00%          | 60            |                     |                     |                   |                          |
|             | 225192                    | SNP         | G                     | A                  | Non Synonymous | 99.50%       | 100.00%          | 60            | CDS                 | SPN3US_0252         | c.269G>A          | p.S90N                   |
|             | 239933                    | Ins         | -                     | T                  |                | 97.50%       | 100.00%          | 60            |                     |                     |                   |                          |
|             |                           |             |                       |                    |                |              |                  |               |                     |                     |                   |                          |
| <b>am13</b> | <b>Reference Position</b> | <b>Type</b> | <b>Reference Base</b> | <b>Called Base</b> | <b>Impact</b>  | <b>SNP %</b> | <b>P not ref</b> | <b>Q call</b> | <b>Feature Type</b> | <b>Feature Name</b> | <b>DNA Change</b> | <b>Amino Acid Change</b> |
|             | 66658                     | SNP         | C                     | T                  | Nonsense       | 99.80%       | 100.00%          | 60            | CDS                 | SPN3US_0070         | c.181C>T          | p.Q61.                   |
|             | 87716                     | Ins         | -                     | C                  |                | 74.70%       | 100.00%          | 60            |                     |                     |                   |                          |
|             | 98642                     | SNP         | G                     | A                  | Non Synonymous | 100.00%      | 100.00%          | 60            | CDS                 | SPN3US_0107         | c.151G>A          | p.D51N                   |
|             | 125063                    | SNP         | A                     | T                  | Synonymous     | 100.00%      | 100.00%          | 60            | CDS                 | SPN3US_0148         | c.177A>T          | p.G59G                   |
|             | 125066                    | SNP         | T                     | C                  | Synonymous     | 100.00%      | 100.00%          | 60            | CDS                 | SPN3US_0148         | c.180T>C          | p.F60F                   |
|             | 125067                    | SNP         | G                     | T                  | Non            | 99.60%       | 100.00%          | 60            | CDS                 | SPN3US_0148         | c.181G>T          | p.A61S                   |

|             |                               |             |                           |                        |                   |              |                      |                   |                         |                     |                       |                                  |
|-------------|-------------------------------|-------------|---------------------------|------------------------|-------------------|--------------|----------------------|-------------------|-------------------------|---------------------|-----------------------|----------------------------------|
|             |                               |             |                           |                        | Synonymous        |              |                      |                   |                         |                     |                       |                                  |
|             | 125075                        | SNP         | A                         | G                      | Synonymous        | 100.00%      | 100.00%              | 60                | CDS                     | SPN3US_0148         | c.189A>G              | p.E63E                           |
|             | 125076                        | SNP         | A                         | T                      | Non<br>Synonymous | 100.00%      | 100.00%              | 60                | CDS                     | SPN3US_0148         | c.190A>T              | p.I64L                           |
|             | 125077                        | SNP         | T                         | G                      | Non<br>Synonymous | 100.00%      | 100.00%              | 60                | CDS                     | SPN3US_0148         | c.191T>G              | p.I64R                           |
|             | 125078                        | SNP         | A                         | C                      | Synonymous        | 100.00%      | 100.00%              | 60                | CDS                     | SPN3US_0148         | c.192A>C              | p.I64I                           |
|             | 125084                        | SNP         | A                         | T                      | Synonymous        | 100.00%      | 100.00%              | 60                | CDS                     | SPN3US_0148         | c.198A>T              | p.V66V                           |
|             | 156655                        | SNP         | C                         | T                      | Non<br>Synonymous | 100.00%      | 100.00%              | 60                | CDS                     | SPN3US_0170         | c.2017G>A             | p.V673I                          |
|             | 163552                        | SNP         | C                         | T                      | Synonymous        | 99.60%       | 100.00%              | 60                | CDS                     | SPN3US_0176         | c.223C>T              | p.L75L                           |
|             | 208784                        | SNP         | G                         | A                      | Non<br>Synonymous | 99.80%       | 100.00%              | 60                | CDS                     | SPN3US_0239         | c.3544C>T             | p.L1182F                         |
|             | 239933                        | Ins         | -                         | T                      |                   | 98.30%       | 100.00%              | 60                |                         |                     |                       |                                  |
|             |                               |             |                           |                        |                   |              |                      |                   |                         |                     |                       |                                  |
|             |                               |             |                           |                        |                   |              |                      |                   |                         |                     |                       |                                  |
| <b>am18</b> | <b>Reference<br/>Position</b> | <b>Type</b> | <b>Reference<br/>Base</b> | <b>Called<br/>Base</b> | <b>Impact</b>     | <b>SNP %</b> | <b>P not<br/>ref</b> | <b>Q<br/>call</b> | <b>Feature<br/>Type</b> | <b>Feature Name</b> | <b>DNA<br/>Change</b> | <b>Amino<br/>Acid<br/>Change</b> |
|             | 53558                         | SNP         | C                         | T                      |                   | 99.60%       | 100.00%              | 60                |                         |                     |                       |                                  |
|             | 109538                        | SNP         | G                         | A                      | Non<br>Synonymous | 99.60%       | 100.00%              | 60                | CDS                     | SPN3US_0124         | c.2713G>A             | p.V905M                          |
|             | 134633                        | SNP         | G                         | A                      | Non<br>Synonymous | 99.50%       | 100.00%              | 60                | CDS                     | SPN3US_0155         | c.1465G>A             | p.G489S                          |
|             | 150861                        | SNP         | G                         | A                      | Non<br>Synonymous | 99.60%       | 100.00%              | 60                | CDS                     | SPN3US_0169         | c.4085C>T             | p.T1362I                         |
|             | 161758                        | SNP         | C                         | T                      | Synonymous        | 100.00%      | 100.00%              | 60                | CDS                     | SPN3US_0174         | c.166C>T              | p.L56L                           |
|             | 179577                        | SNP         | C                         | T                      | Nonsense          | 99.80%       | 100.00%              | 60                | CDS                     | SPN3US_0203         | c.377G>A              | p.W126.                          |
|             | 197542                        | SNP         | G                         | A                      | Non<br>Synonymous | 99.60%       | 100.00%              | 60                | CDS                     | SPN3US_0228         | c.803G>A              | p.G268D                          |
|             | 219687                        | SNP         | G                         | A                      | Non<br>Synonymous | 99.80%       | 100.00%              | 60                | CDS                     | SPN3US_0243         | c.1156G>A             | p.A386T                          |
|             | 225627                        | SNP         | G                         | A                      |                   | 99.90%       | 100.00%              | 60                |                         |                     |                       |                                  |
|             | 239933                        | Ins         | -                         | T                      |                   | 98.40%       | 100.00%              | 60                |                         |                     |                       |                                  |



| -    | -                  | -    | -              | -           | -              | -       | -         | -      | -            | -            | -          | -                 |
|------|--------------------|------|----------------|-------------|----------------|---------|-----------|--------|--------------|--------------|------------|-------------------|
| am19 | Reference Position | Type | Reference Base | Called Base | Impact         | SNP %   | P not ref | Q call | Feature Type | Feature Name | DNA Change | Amino Acid Change |
|      | 48821              | SNP  | G              | A           | Non Synonymous | 99.50%  | 100.00%   | 60     | CDS          | SPN3US_0048  | c.802C>T   | p.P268S           |
|      | 93455              | Ins  | -              | T           |                | 89.90%  | 100.00%   | 60     |              |              |            |                   |
|      | 178201             | SNP  | G              | A           | Synonymous     | 99.90%  | 100.00%   | 60     | CDS          | SPN3US_0202  | c.363C>T   | p.V121V           |
|      | 179287             | SNP  | G              | A           | Nonsense       | 99.80%  | 100.00%   | 60     | CDS          | SPN3US_0203  | c.667C>T   | p.Q223.           |
|      | 179288             | SNP  | G              | A           | Synonymous     | 99.80%  | 100.00%   | 60     | CDS          | SPN3US_0203  | c.666C>T   | p.D222D           |
|      | 189407             | SNP  | A              | G           | Non Synonymous | 99.90%  | 100.00%   | 60     | CDS          | SPN3US_0216  | c.1457A>G  | p.D486G           |
|      | 239301             | SNP  | G              | A           | Non Synonymous | 99.60%  | 100.00%   | 60     | CDS          | SPN3US_0263  | c.1073G>A  | p.S358N           |
|      | 239933             | Ins  | -              | T           |                | 96.50%  | 100.00%   | 60     |              |              |            |                   |
|      | 240020             | SNP  | C              | T           |                | 99.70%  | 100.00%   | 60     |              |              |            |                   |
|      |                    |      |                |             |                |         |           |        |              |              |            |                   |
| am22 | Reference Position | Type | Reference Base | Called Base | Impact         | SNP %   | P not ref | Q call | Feature Type | Feature Name | DNA Change | Amino Acid Change |
|      | 23427              | SNP  | C              | T           | Nonsense       | 100.00% | 100.00%   | 60     | CDS          | SPN3US_0029  | c.358C>T   | p.Q120.           |
|      | 191277             | SNP  | G              | A           | Non Synonymous | 99.80%  | 100.00%   | 60     | CDS          | SPN3US_0220  | c.298C>T   | p.H100Y           |
|      | 239933             | Ins  | -              | T           |                | 63.50%  | 90.00%    | 41.7   |              |              |            |                   |
|      |                    |      |                |             |                |         |           |        |              |              |            |                   |
| am27 | Reference Position | Type | Reference Base | Called Base | Impact         | SNP %   | P not ref | Q call | Feature Type | Feature Name | DNA Change | Amino Acid Change |
|      | 1658               | SNP  | C              | T           | Non Synonymous | 99.50%  | 100.00%   | 60     | CDS          | SPN3US_0001  | c.473C>T   | p.T158I           |
|      | 63957              | SNP  | C              | T           | Nonsense       | 99.50%  | 100.00%   | 60     | CDS          | SPN3US_0064  | c.871C>T   | p.Q291.           |
|      | 75215              | SNP  | G              | A           | Non Synonymous | 99.50%  | 100.00%   | 60     | CDS          | SPN3US_0077  | c.1462G>A  | p.G488S           |
|      | 88765              | SNP  | C              | T           | Non            | 99.50%  | 100.00%   | 60     | CDS          | SPN3US_0092  | c.317C>T   | p.P106L           |

|             |                               |             |                           |                        |                   |              |                      |                   |                         |                     |                       |                                  |
|-------------|-------------------------------|-------------|---------------------------|------------------------|-------------------|--------------|----------------------|-------------------|-------------------------|---------------------|-----------------------|----------------------------------|
|             |                               |             |                           |                        | Synonymous        |              |                      |                   |                         |                     |                       |                                  |
|             | 100963                        | SNP         | C                         | T                      | Nonsense          | 99.90%       | 100.00%              | 60                | CDS                     | SPN3US_0112         | c.100C>T              | p.Q34.                           |
|             | 133692                        | SNP         | C                         | T                      | Non<br>Synonymous | 99.90%       | 100.00%              | 60                | CDS                     | SPN3US_0155         | c.524C>T              | p.A175V                          |
|             | 171967                        | SNP         | C                         | T                      | Synonymous        | 99.60%       | 100.00%              | 60                | CDS                     | SPN3US_0189         | c.102C>T              | p.I34I                           |
|             | 206491                        | SNP         | G                         | A                      | Non<br>Synonymous | 99.60%       | 100.00%              | 60                | CDS                     | SPN3US_0239         | c.5837C>T             | p.S1946L                         |
|             | 239933                        | Ins         | -                         | T                      |                   | 96.50%       | 100.00%              | 60                |                         |                     |                       |                                  |
|             |                               |             |                           |                        |                   |              |                      |                   |                         |                     |                       |                                  |
| <b>am39</b> | <b>Reference<br/>Position</b> | <b>Type</b> | <b>Reference<br/>Base</b> | <b>Called<br/>Base</b> | <b>Impact</b>     | <b>SNP %</b> | <b>P not<br/>ref</b> | <b>Q<br/>call</b> | <b>Feature<br/>Type</b> | <b>Feature Name</b> | <b>DNA<br/>Change</b> | <b>Amino<br/>Acid<br/>Change</b> |
|             | 169242                        | SNP         | C                         | T                      | Nonsense          | 99.50%       | 100.00%              | 60                | CDS                     | SPN3US_0186         | c.343C>T              | p.Q115.                          |
|             | 198993                        | SNP         | C                         | T                      | Non<br>Synonymous | 99.80%       | 100.00%              | 60                | CDS                     | SPN3US_0230         | c.332C>T              | p.T111M                          |
|             | 200946                        | Ins         | -                         | T                      |                   | 91.70%       | 100.00%              | 60                |                         |                     |                       |                                  |
|             | 239933                        | Ins         | -                         | T                      |                   | 97.40%       | 100.00%              | 60                |                         |                     |                       |                                  |
|             |                               |             |                           |                        |                   |              |                      |                   |                         |                     |                       |                                  |
| <b>am43</b> | <b>Reference<br/>Position</b> | <b>Type</b> | <b>Reference<br/>Base</b> | <b>Called<br/>Base</b> | <b>Impact</b>     | <b>SNP %</b> | <b>P not<br/>ref</b> | <b>Q<br/>call</b> | <b>Feature<br/>Type</b> | <b>Feature Name</b> | <b>DNA<br/>Change</b> | <b>Amino<br/>Acid<br/>Change</b> |
|             | 97805                         | SNP         | G                         | A                      | Non<br>Synonymous | 99.40%       | 100.00%              | 60                | CDS                     | SPN3US_0106         | c.127G>A              | p.D43N                           |
|             | 111698                        | SNP         | C                         | T                      | Non<br>Synonymous | 99.60%       | 100.00%              | 60                | CDS                     | SPN3US_0129         | c.191C>T              | p.S64L                           |
|             | 187276                        | SNP         | C                         | T                      | Non<br>Synonymous | 100.00%      | 100.00%              | 60                | CDS                     | SPN3US_0214         | c.262G>A              | p.E88K                           |
|             | 200945                        | Ins         | -                         | T                      |                   | 93.00%       | 100.00%              | 60                |                         |                     |                       |                                  |
|             | 215999                        | SNP         | C                         | T                      | Nonsense          | 100.00%      | 100.00%              | 60                | CDS                     | SPN3US_0241         | c.2011C>T             | p.Q671.                          |
|             | 223314                        | SNP         | C                         | T                      |                   | 99.50%       | 100.00%              | 60                |                         |                     |                       |                                  |
|             | 239933                        | Ins         | -                         | T                      |                   | 98.30%       | 100.00%              | 60                |                         |                     |                       |                                  |
|             |                               |             |                           |                        |                   |              |                      |                   |                         |                     |                       |                                  |
| <b>am50</b> | <b>Reference<br/>Position</b> | <b>Type</b> | <b>Reference<br/>Base</b> | <b>Called<br/>Base</b> | <b>Impact</b>     | <b>SNP %</b> | <b>P not<br/>ref</b> | <b>Q<br/>call</b> | <b>Feature<br/>Type</b> | <b>Feature Name</b> | <b>DNA<br/>Change</b> | <b>Amino<br/>Acid</b>            |

|  |        |     |   |   |                   |         |         |    |     |             |           | <b>Change</b> |
|--|--------|-----|---|---|-------------------|---------|---------|----|-----|-------------|-----------|---------------|
|  | 13843  | SNP | G | A |                   | 100.00% | 100.00% | 60 |     |             |           |               |
|  | 54485  | SNP | G | A | Non<br>Synonymous | 99.50%  | 100.00% | 60 | CDS | SPN3US_0053 | c.880G>A  | p.G294S       |
|  | 61814  | SNP | C | T | Non<br>Synonymous | 99.50%  | 100.00% | 60 | CDS | SPN3US_0062 | c.625C>T  | p.P209S       |
|  | 77967  | Ins | - | T |                   | 87.90%  | 100.00% | 60 |     |             |           |               |
|  | 94766  | SNP | C | T | Non<br>Synonymous | 99.80%  | 100.00% | 60 | CDS | SPN3US_0102 | c.80C>T   | p.S27F        |
|  | 102552 | SNP | C | T | Non<br>Synonymous | 99.90%  | 100.00% | 60 | CDS | SPN3US_0115 | c.367C>T  | p.P123S       |
|  | 135155 | SNP | C | T | Non<br>Synonymous | 100.00% | 100.00% | 60 | CDS | SPN3US_0155 | c.1987C>T | p.P663S       |
|  | 156070 | SNP | C | T | Non<br>Synonymous | 99.80%  | 100.00% | 60 | CDS | SPN3US_0170 | c.2602G>A | p.G868S       |
|  | 164973 | SNP | C | T | Non<br>Synonymous | 99.50%  | 100.00% | 60 | CDS | SPN3US_0178 | c.490C>T  | p.P164S       |
|  | 170544 | SNP | C | T | Nonsense          | 99.50%  | 100.00% | 60 | CDS | SPN3US_0186 | c.1645C>T | p.Q549.       |
|  | 181126 | SNP | G | A | Synonymous        | 99.40%  | 100.00% | 60 | CDS | SPN3US_0206 | c.63G>A   | p.E21E        |
|  | 222769 | SNP | G | A | Non<br>Synonymous | 100.00% | 100.00% | 60 | CDS | SPN3US_0248 | c.116G>A  | p.R39H        |
|  | 239933 | Ins | - | T |                   | 87.70%  | 100.00% | 60 |     |             |           |               |

**Table S4 –Mass spectral counts obtained by GelCMS for the two amber mutants, 24/am11 (gp241-) and 64\_112am27 (gp64-/ gp112-), propagated on permissive (sup+) and non-permissive (sup-) strains of *Salmonella* Typhimurium (TT6675 and TT9079, respectively).**

|    |                        |           |           | Total spectrum count |           |
|----|------------------------|-----------|-----------|----------------------|-----------|
| gp | Molecular weight (kDa) | am11 sup+ | am11 sup- | am27 sup+            | am27 sup- |
| 8  | 30.3                   | 27        | 22        | 30                   | 30        |
| 17 | 15.3                   | 21        | 19        | 21                   |           |
| 21 | 40.7                   | 29        | 19        | 19                   | 22        |
| 25 | 14.6                   | 10        | 6         | 8                    |           |
| 37 | 14.6                   | 6         |           | 4                    |           |
| 38 | 23.2                   | 6         | 4         |                      |           |
| 41 | 31.8                   |           |           | 11                   |           |
| 42 | 49.3                   | 27        |           | 37                   | 36        |
| 45 | 50.3                   | 90        | 73        | 124                  | 128       |
| 46 | 16.2                   | 20        | 15        | 22                   | 15        |
| 47 | 62.8                   | 70        | 66        | 205                  | 108       |
| 48 | 111.0                  | 145       | 132       | 164                  |           |
| 49 | 48.1                   | 10        | 14        | 3                    |           |
| 50 | 39.4                   | 72        | 66        | 82                   | 76        |
| 51 | 34.9                   | 93        | 68        | 90                   | 86        |
| 52 | 21.0                   | 19        | 19        | 26                   | 21        |
| 53 | 45.2                   | 506       | 444       | 708                  | 703       |

|     |       |     |      |      |      |
|-----|-------|-----|------|------|------|
| 54  | 45.1  | 499 | 497  | 681  | 645  |
| 61  | 58.3  | 24  | 24   | 33   |      |
| 62  | 52.0  | 38  | 39   | 35   |      |
| 64  | 48.9  | 11  | 9    | 9    |      |
| 74  | 12.9  | 45  | 35   | 45   | 35   |
| 75  | 83.9  | 803 | 1077 | 1723 | 1691 |
| 81  | 100.2 | 89  | 57   | 125  | 105  |
| 82  | 84.8  | 53  | 46   | 51   |      |
| 83  | 20.0  | 20  | 20   | 19   | 18   |
| 84  | 32.9  | 76  | 66   | 66   |      |
| 91  | 23.6  | 17  | 13   | 10   |      |
| 94  | 41.6  | 9   | 11   | 12   | 17   |
| 95  | 17.6  | 17  | 12   | 11   | 6    |
| 97  | 11.9  | 6   | 6    | 6    | 3    |
| 109 | 17.7  | 12  | 12   | 28   | 38   |
| 123 | 16.5  |     |      | 5    |      |
| 124 | 113.7 | 79  | 72   | 64   |      |
| 138 | 29.2  | 42  | 47   | 40   | 44   |
| 139 | 29.8  | 43  | 46   | 44   | 36   |
| 140 | 31.4  | 29  | 36   | 31   | 39   |
| 141 | 32.6  | 311 | 319  | 420  | 326  |
| 142 | 30.8  | 55  | 72   | 85   | 63   |
| 143 | 31.9  | 108 | 107  | 234  | 134  |

|     |       |     |     |     |     |
|-----|-------|-----|-----|-----|-----|
| 144 | 30.0  | 76  | 83  | 102 | 91  |
| 145 | 50.8  | 25  | 24  | 30  | 31  |
| 146 | 36.9  | 32  | 26  | 34  | 31  |
| 147 | 33.7  | 19  | 17  | 23  | 17  |
| 148 | 53.7  | 45  | 49  | 47  | 52  |
| 149 | 36.2  | 60  | 69  | 65  | 54  |
| 150 | 33.8  | 31  | 34  | 35  | 20  |
| 151 | 52.2  | 21  | 25  | 34  | 18  |
| 152 | 36.8  | 70  | 73  | 80  | 52  |
| 153 | 33.8  | 24  | 33  | 27  | 16  |
| 154 | 50.0  | 29  | 30  | 22  | 30  |
| 155 | 78.3  | 65  | 61  | 80  | 61  |
| 160 | 18.5  | 124 | 112 | 280 | 149 |
| 167 | 44.8  | 58  | 42  | 79  |     |
| 168 | 188.1 | 258 | 213 | 292 |     |
| 169 | 149.0 | 244 | 199 | 252 |     |
| 170 | 135.4 | 157 | 154 | 189 |     |
| 171 | 47.6  | 25  | 27  | 30  |     |
| 173 | 34.6  | 8   | 4   | 8   |     |
| 193 | 19.9  | 12  | 11  | 9   | 6   |
| 202 | 23.5  | 42  | 40  | 38  |     |
| 203 | 51.9  | 53  | 40  | 54  |     |
| 214 | 28.1  | 61  | 64  | 77  | 68  |

|     |       |          |          |     |                 |
|-----|-------|----------|----------|-----|-----------------|
| 218 | 25.2  | 24       |          | 23  | 28              |
| 223 | 45.3  | 24       | 25       | 29  |                 |
| 225 | 25.1  | 24       | 21       | 23  | 15              |
| 237 | 19.9  | 40       | 32       | 32  |                 |
| 238 | 82.1  | 32       | 29       | 55  |                 |
| 239 | 259.1 | <u>5</u> | <u>6</u> | 100 |                 |
| 240 | 59.6  | 14       |          | 56  | 38              |
| 241 | 159.1 | 110      |          | 203 | 152             |
| 242 | 10.5  | 8        | 8        | 18  | 10              |
| 243 | 54.6  | 174      | 164      | 221 | 217             |
| 244 | 27.0  | 10       |          | 12  | 13              |
| 245 | 30.7  | 46       | 34       | 28  | 26              |
| 246 | 23.9  | 32       | 39       | 28  | 39              |
| 248 | 21.0  | 18       | 13       | 14  | 10              |
| 255 | 32.7  | 199      | 188      | 244 |                 |
| 256 | 75.7  | 607      | 518      | 686 | <b><u>8</u></b> |
| 257 | 34.2  | 70       | 65       | 96  | 83              |
| 258 | 96.4  | 102      | 101      | 124 |                 |
| 259 | 61.0  | 139      | 136      | 153 |                 |
| 262 | 52.7  | 33       | 15       | 41  | 42              |
